# Supplementary material for: Solar-driven simultaneous production of hypochlorous acid and hydrogen from saline water over RhCrOx-loaded SrTiO3 photocatalyst systems
Source: Royal Society of Chemistry journal article supplement (doi:10.1039/d3se01163a), 2023-11-24
Supplement: d3se01163a1.pdf [file d3se01163a1.pdf]

1 ***Supporting Information***

2

3 **Solar-light Driven Simultaneous Hypochlorous acid and Hydrogen**  
4 **Generation over RhCrO<sub>x</sub>-loaded SrTiO<sub>3</sub> Photocatalyst Systems**

5

6 Sayuri Okunaka <sup>a,b\*</sup>, Toshio Nakamura <sup>a</sup>, Takeshi Ikeda <sup>a</sup>, Kohei Tsuruda <sup>a</sup> and Hiromasa  
7 Tokudome <sup>a\*</sup>

8

9 <sup>a</sup>*Research Institute, TOTO LTD., 2-8-1 Honson, Chigasaki, Kanagawa. 253-8577, Japan*

10 <sup>b</sup>*Department of Applied Chemistry, Faculty of Science and Engineering, Tokyo City*  
11 *University, 1-28-1 Tamazutsumi, Setagaya-ku, Tokyo, 158-8557, Japan*

12

13 E-mail: okunakas@tcu.co.jp, hiromasa.tokudome@jp.toto.com

## 15 **Experimental**

### 16 **Characterization**

17 SrTiO<sub>3</sub>:Al particles loaded with/without co-catalyst were characterized by using an X-  
18 ray diffractometer (XRD, PANalytical, X'Pert Pro, rotating anode diffractometer, 45 kV,  
19 40 mA) with Cu K $\alpha$  radiation ( $\lambda_{K\alpha} = 1.5406 \text{ \AA}$ ), a UV-vis-NIR spectrometer equipped  
20 with an integrating sphere (UV-vis. DRS, Jasco, V-670), and a scanning electron  
21 microscope (SEM, HITACHI, SU-8220). X-ray photoelectron spectroscopy (XPS) was  
22 conducted using a monochromatic Mg K $\alpha$  source ( $h\nu = 1253.6 \text{ eV}$ ) with an acceleration  
23 voltage of 8 kV and a current of 10 mA (JEOL, JPS-9000). The analysis chamber pressure  
24 was on the order of  $10^{-6}$  Pa. The binding energies were calibrated using the C1s peak  
25 (284.8 eV) as a reference.

26

### 27 **Photocatalytic reaction**

28 The photocatalytic HClO and/or H<sub>2</sub> production on SrTiO<sub>3</sub>:Al particles loaded  
29 with/without co-catalyst was carried out using a screw-top test tube. The temperature of  
30 the reaction system was controlled to keep at 25 °C using a water bath. the SrTiO<sub>3</sub>:Al  
31 particles (10 mg) were added to an aqueous NaCl solution (5 mL), and the light was  
32 irradiated from the side of the reactor tube by a simulated solar light (HAL-320, Asahi  
33 Spectra Co., Ltd.), where the light intensity was adjusted at  $100 \text{ mW cm}^{-2}$  (AM1.5G).

34 In the case of the photocatalytic HClO and/or H<sub>2</sub> production on the SrTiO<sub>3</sub>:Al panels  
35 loaded with/without co-catalyst, the reactions were carried out in a Pyrex-made reaction  
36 vessel, in which the panel was horizontally fixed in 10 mL of aqueous NaCl solution,  
37 connected to a closed gas-circulating system.

38 The amounts of HClO produced were analyzed by using the *N, N*-diethyl-*p*-  
39 phenylenediamine (DPD) method. The amounts of H<sub>2</sub> produced were analyzed and  
40 quantified by using an on-line gas chromatograph (GL Science; GC-3200, TCD, Ar  
41 carrier, MS-5A column).

42

43

## 44 Results

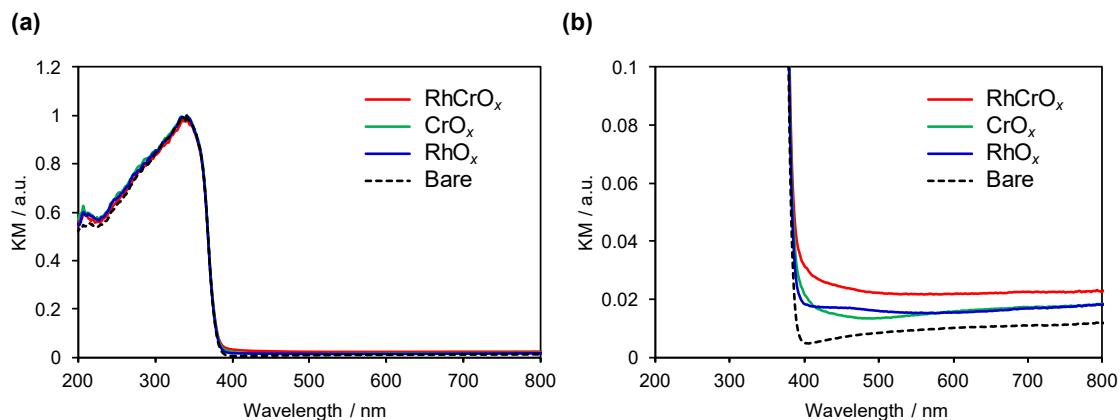

45  
46 **Figure S1.** (a) UV-vis DRS spectra of the SrTiO<sub>3</sub>:Al photocatalysts with/without co-  
47 catalyst (RhO<sub>x</sub>, CrO<sub>x</sub>, and RhCrO<sub>x</sub>). (b) The y-axis is the magnified. Loading amount of  
48 co-catalyst: 0.1 wt%  
49

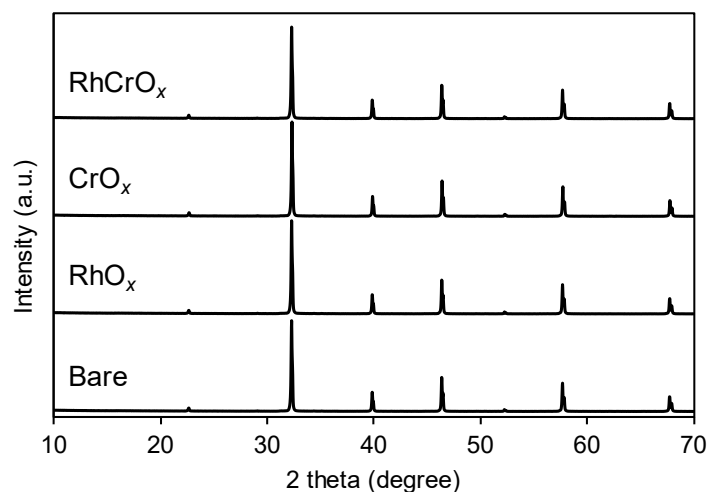

50  
51 **Figure S2.** XRD patterns of the SrTiO<sub>3</sub>:Al photocatalysts with/without co-catalyst (RhO<sub>x</sub>,  
52 CrO<sub>x</sub>, and RhCrO<sub>x</sub>). Loading amount of co-catalyst: 0.1 wt%  
53  
54

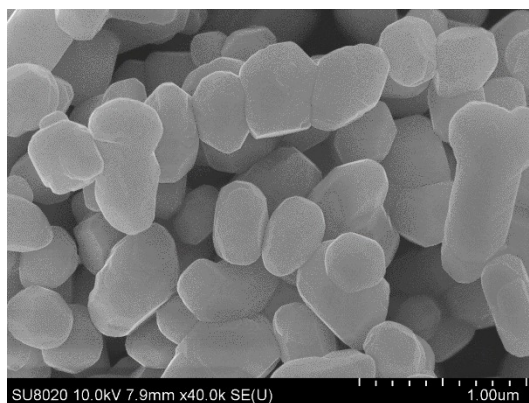

55

56 **Figure S3.** SEM image of RhCrO<sub>x</sub>/SrTiO<sub>3</sub>:Al photocatalyst prepared *via* flux synthesis.

57

58

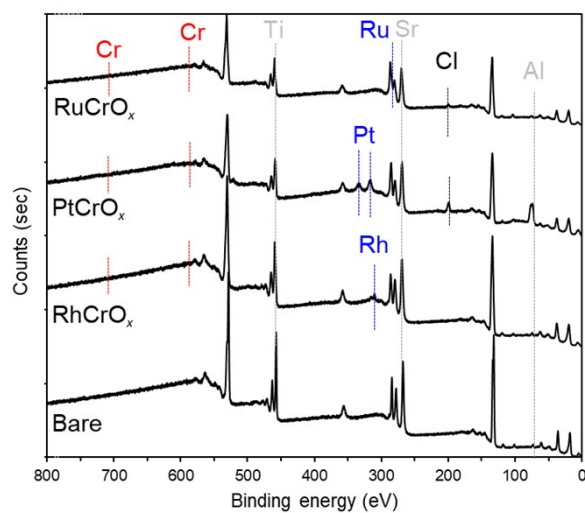

59

60 **Figure S4.** XPS spectra of the SrTiO<sub>3</sub>:Al photocatalysts with/without co-catalyst  
61 (RhCrO<sub>x</sub>, PtCrO<sub>x</sub>, and RuCrO<sub>x</sub>). Loading amount of co-catalyst: 0.1 wt%

62

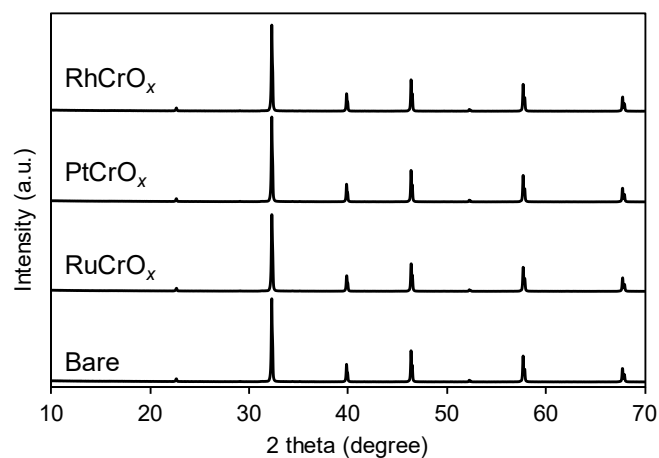

63

64 **Figure S5.** XRD patterns of the SrTiO<sub>3</sub>:Al photocatalysts with/without co-catalyst  
65 (RhCrO<sub>x</sub>, PtCrO<sub>x</sub>, and RuCrO<sub>x</sub>). Loading amount of co-catalyst: 0.1 wt%

66

67

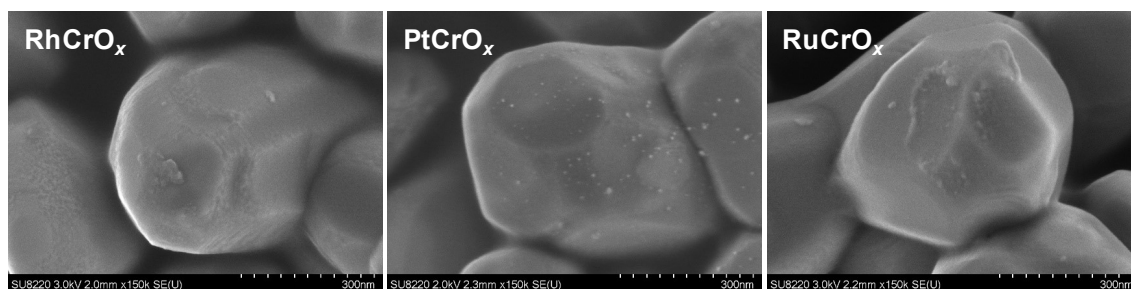

68

69 **Figure S6.** SEM images of SrTiO<sub>3</sub>:Al with co-catalyst (RhCrO<sub>x</sub>, PtCrO<sub>x</sub>, and RuCrO<sub>x</sub>).  
70 Loading amount of co-catalyst: 0.1 wt%

71

72

73

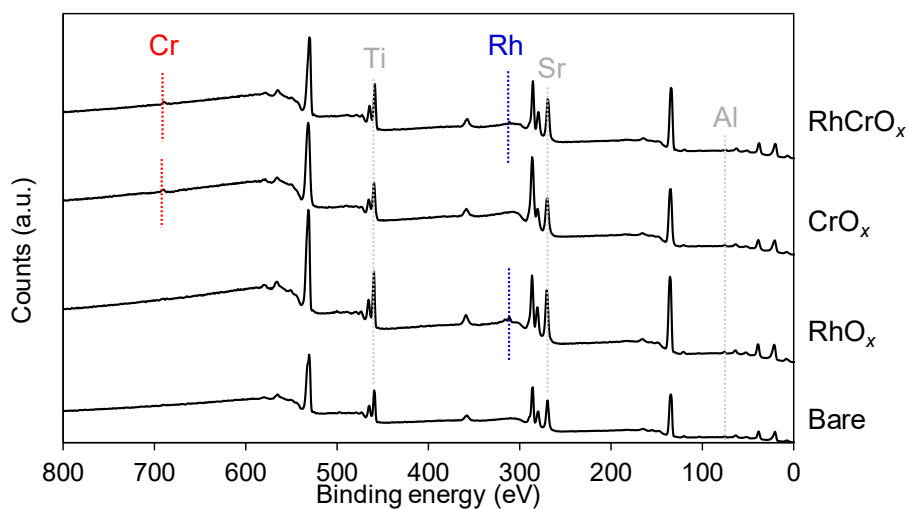

74  
 75 **Figure S7.** XPS spectra of the bare  $\text{SrTiO}_3\text{:Al}$  photocatalyst and those with loading  $\text{RhO}_x$ ,  
 76  $\text{CrO}_x$ ,  $\text{RhCrO}_x$  cocatalyst.  
 77  
 78

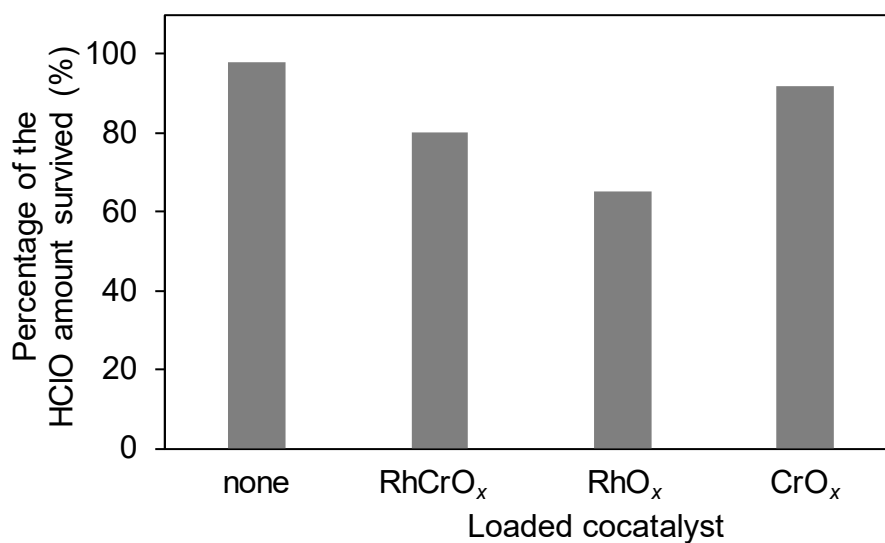

79  
 80 **Figure S8.** Changes in the  $\text{HClO}$  after the addition of the bare  $\text{SrTiO}_3\text{:Al}$  photocatalyst,  
 81 and  $\text{RhO}_x$ ,  $\text{CrO}_x$ , and  $\text{RhCrO}_x$  loaded ones in the aqueous  $\text{NaCl}$  solution that  $\text{HClO}$  (0.05  
 82 mmol) was initially added.  
 83 Catalyst, 0.01 g; reactant solution, 5 mL of 1M aqueous  $\text{NaCl}$  solution; dark condition.  
 84 Reaction time; 4 h  
 85

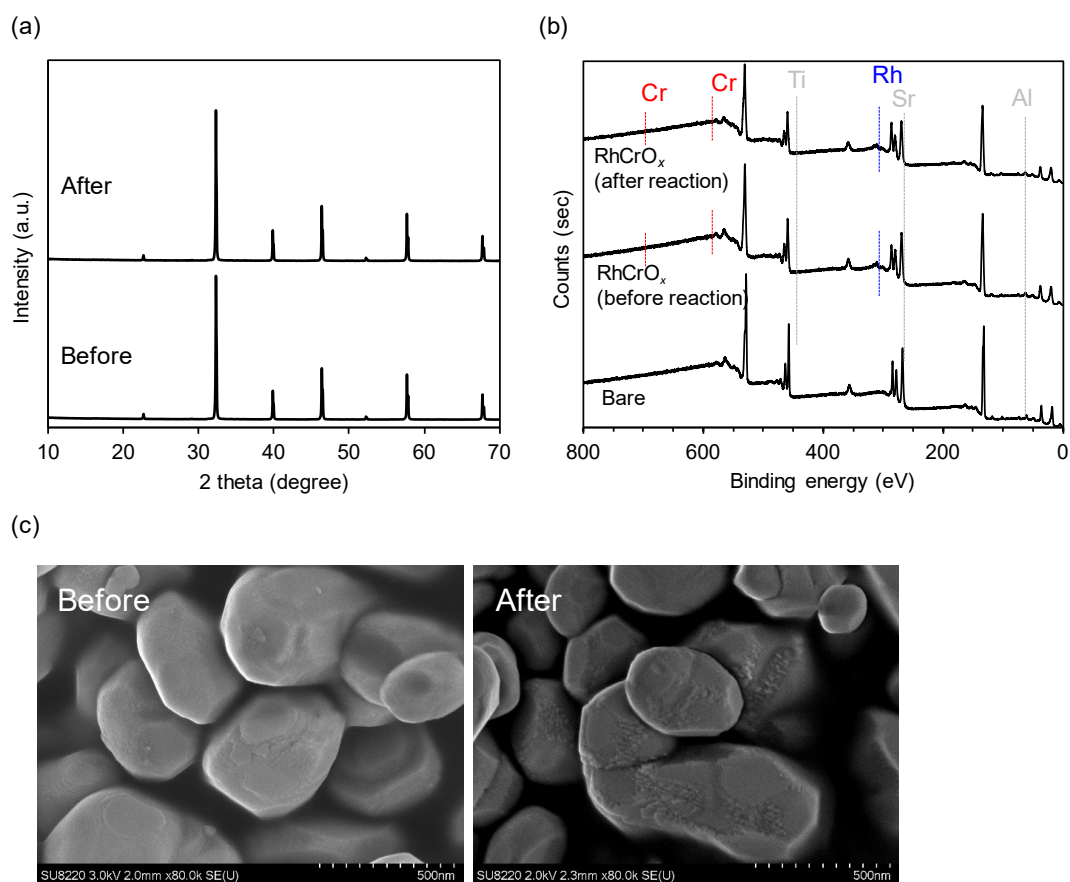

86

87 **Figure S9.** (a) XRD patterns, (b) XPS spectra, and (c) SEM images of the  
 88  $\text{RhCrO}_x/\text{SrTiO}_3:\text{Al}$  photocatalysts before/after the reaction.

89

90

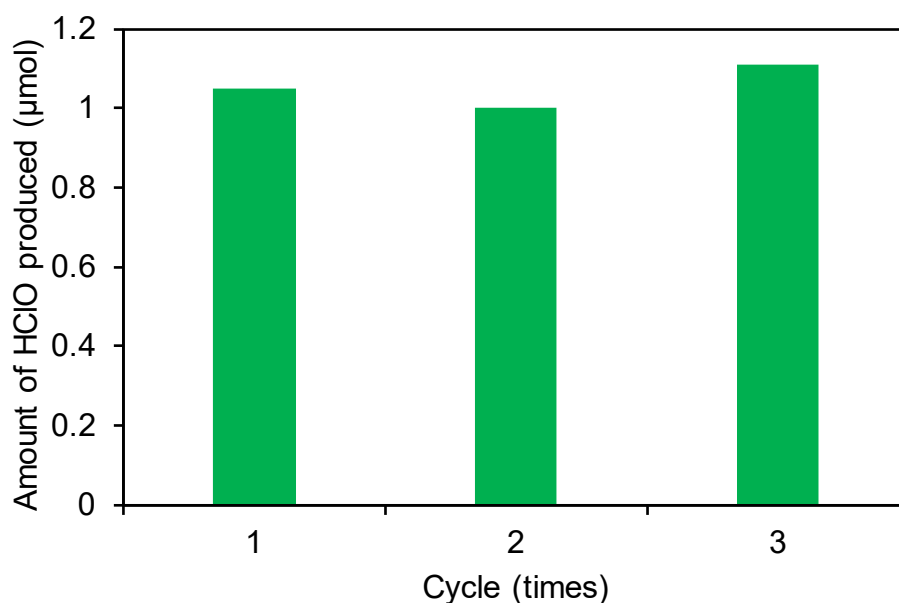

91

92 **Figure S10.** Recyclability of RhCrO<sub>x</sub>/SrTiO<sub>3</sub>:Al photocatalyst in the 1 M of aqueous  
 93 NaCl solution under solar-light irradiation. Catalyst, 0.01 g; reactant solution, 5 mL of  
 94 aqueous NaCl solution; light source, simulated solar light (AM 1.5G); Irradiation time,  
 95 1h.

96

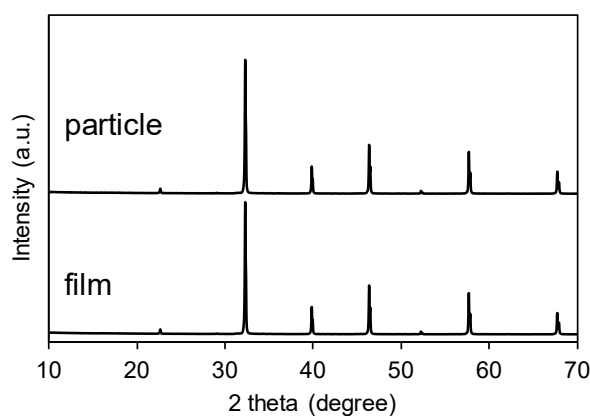

97

98 **Figure S11.** XRD patterns of the RhCrO<sub>x</sub>/SrTiO<sub>3</sub>:Al particle and film.

99

100

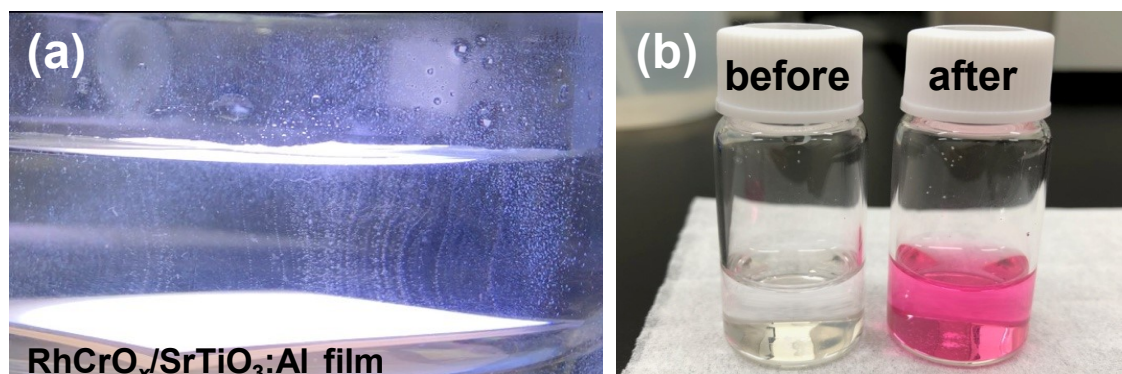

**Figure S12.** Photograph of (a)  $\text{H}_2$  production over the  $\text{RhCrO}_x/\text{SrTiO}_3:\text{Al}$  film in an aqueous  $\text{NaCl}$  solution under UV-light irradiation and (b) before/after the reaction solution to which DPD reagent was added.

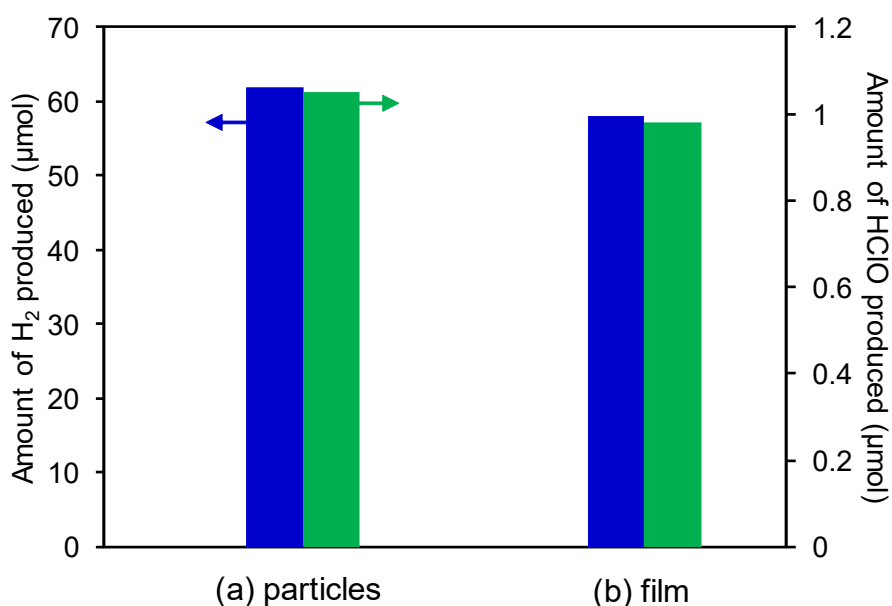

**Figure S13.** The  $\text{H}_2$  and  $\text{HClO}$  production amounts on the (a)  $\text{RhCrO}_x/\text{SrTiO}_3:\text{Al}$  film and (b) particles. A  $2.5 \times 2.5$  cm sheet in which contains 10 mg of  $\text{RhCrO}_x/\text{SrTiO}_3:\text{Al}$  photocatalyst, and 10 mg of particles were used for the reaction. Reaction conditions: co-catalyst,  $\text{RhCrO}_x$ ; solution, 10 mL of  $\text{NaCl}$  aq.; light source, simulated solar light (AM1.5G).
